# Supplementary material for: Cadherin Protein Is Involved in the Action of Bacillus thuringiensis Cry1Ac Toxin in Ostrinia furnacalis
Source: MDPI journal article supplement (doi:10.3390/toxins13090658), 2021-09-15
Supplement: s1 [file s1]

**Supplementary Materials: Cadherin protein is involved in the action of  
*Bacillus thuringiensis* Cry1Ac toxin in *Ostrinia furnacalis***

Wenzhong Jin, Yuqian Zhai, Yihua Yang, Yidong Wu and Xingliang Wang

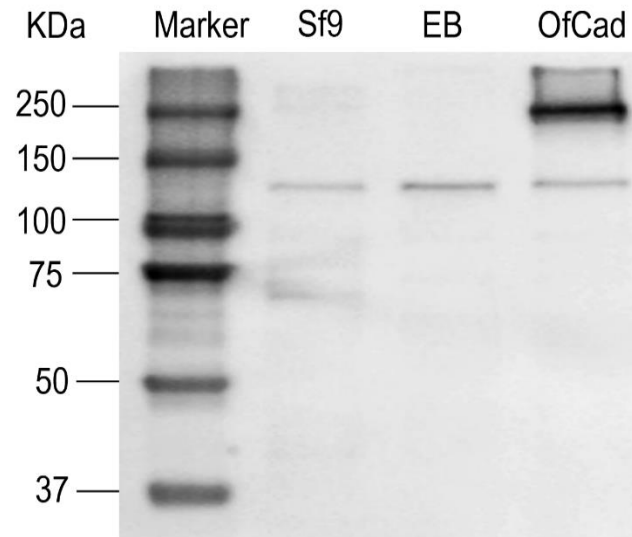

**Figure S1.** Immunoblot analysis of *Ostrinia furnacalis* cadherin (OfCad) from Sf9 cell extracts. Equivalent amounts (10  $\mu$ g) of recombinant OfCad proteins extracted from baculovirus-transfected Sf9 cells were separated by SDS-PAGE and transferred to a PVDF membrane. Immunoblot was probed with anti-His TagMouse monoclonal antibody and HPR-conjugated goat anti-mouse. Bands indicate cross-reactivity with anti-His peptide antibody. Extracts from Sf9 (non-transfected Sf9), EB (Sf9 cells transfected with empty bacmid), OfCad (Sf9 cells transfected with full-length wild-type OfCad) are indicated above lanes. WesternC<sup>TM</sup> protein markers (Bio-Rad Laboratories, Inc. USA) were used for immunoblot experiment.

**Table S1.** Mortality of Sf9 cell lines to Cry1Ac toxin. Sf9 present non-transfected Sf9 cells, and Sf9 cells infected by empty bacmid or *Ostrinia furnacalis* OfCad were marked as EB and OfCad in the table, respectively.

| Concentration<br>(nM) | Cell mortality (% , mean $\pm$ SE) |                |                 |
|-----------------------|------------------------------------|----------------|-----------------|
|                       | Sf9                                | EB             | OfCad           |
| 0                     | 1.0 $\pm$ 0.06                     | 2.2 $\pm$ 0.20 | 4.60 $\pm$ 1.20 |
| 1                     | 1.1 $\pm$ 0.20                     | 7.0 $\pm$ 1.64 | 12.1 $\pm$ 1.72 |
| 10                    | 1.0 $\pm$ 0.10                     | 5.5 $\pm$ 0.85 | 17.5 $\pm$ 1.91 |
| 100                   | 1.2 $\pm$ 0.17                     | 6.4 $\pm$ 0.72 | 22.1 $\pm$ 1.68 |
| 333                   | 1.1 $\pm$ 0.06                     | 4.7 $\pm$ 0.78 | 45.7 $\pm$ 0.36 |
| 1000                  | 1.0 $\pm$ 0.15                     | 6.4 $\pm$ 1.72 | 61.9 $\pm$ 2.34 |
| 2000                  | 1.0 $\pm$ 0.20                     | 6.4 $\pm$ 0.85 | 77.8 $\pm$ 2.66 |
| 4000                  | 1.2 $\pm$ 0.15                     | 5.9 $\pm$ 0.20 | 86.9 $\pm$ 1.46 |

**Table S2.** Primers used for PCR amplification in this study. The underlined sequence represents infusion homology arms.

| Primer Name | Primer Sequences (5' to 3')                                         |
|-------------|---------------------------------------------------------------------|
| Full_F      | <u>GGATCCGGAATTC</u> <u>AAAGGCC</u> <u>TT</u> ATGGGGGTTGAGAGGTTCTTC |
| Full_R      | <u>TGAGCTCGTCGACGTAGGC</u> <u>TT</u> ACTTTGGGTGCGGCTGTG             |
| sgRNA_Ex4F  | TAATACGACTCACTATAGGCCAGCCCAGAGCCCAGCT                               |
| sgRNA_Ex4R  | TTCTAGCTCTAAAACAGCTGGGCTCTGGGCTGGC                                  |
| sgRNA_Ex35F | TAATACGACTCACTATAGCCACGCATGGCAACAACCT                               |
| sgRNA_Ex35R | TTCTAGCTCTAAAACAAGTTGTTGCCATGCGTGG                                  |
| Outer_F     | GTTGGCATCGAATCATCACCC                                               |
| Outer_R     | GCCGAATGACGGAGTCGGGTT                                               |
| Inner_F     | CACGATCACCGACCGAGACAT                                               |
| Inner_R     | AGTGAATGACGGAGTCGGGTT                                               |
